# Supplementary material for: Biogeochemical controls on ammonium accumulation in the surface layer of the Southern Ocean
Source: Copernicus journal article supplement (doi:10.5194/bg-19-715-2022), 2022-02-07
Supplement: Supplementary file 1 [file bg-19-715-2022-supplement.zip]

Archive with 9 entries (9 files):
- wc17FigureS2.png
- wc17_figureS5_revised.png
- tableS1_corrmatrix.png
- Smithetal_WC17_supplemental_information_ReviewEdits-v2.pdf
- wc17FigureS3v2.png
- wc17FigureS4.png
- wc17FigureS6_NoUreaMarked.png
- bg-19-715-2022-supplement-title-page.pdf
- wc17FigureS1.png
