# Supplementary material for: Biogeochemical controls on ammonium accumulation in the surface layer of the Southern Ocean
Source: Copernicus journal article supplement (doi:10.5194/bg-19-715-2022), 2022-02-07
Supplement: Supplementary file 1 [file bg-19-715-2022-supplement.zip › bg-19-715-2022-supplement-title-page.pdf]

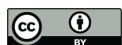

## *Supplement of*

# **Biogeochemical controls on ammonium accumulation in the surface layer of the Southern Ocean**

**Shantelle Smith et al.**

*Correspondence to:* Sarah Fawcett ([sarah.fawcett@uct.ac.za](mailto:sarah.fawcett@uct.ac.za))

- [bg-19-715-2022-supplement-title-page.pdf](#)
- [Smithetal\\_WC17\\_supplemental\\_information\\_ReviewEdits-v2.pdf](#)
- [tableS1\\_corrmatrix.png](#)
- [wc17FigureS1.png](#)
- [wc17FigureS2.png](#)
- [wc17FigureS3v2.png](#)
- [wc17FigureS4.png](#)
- [wc17FigureS6\\_NoUreaMarked.png](#)
- [wc17\\_figureS5\\_revised.png](#)

The copyright of individual parts of the supplement might differ from the article licence.
