# Supplementary material for: Biogeochemical controls on ammonium accumulation in the surface layer of the Southern Ocean
Source: Copernicus journal article supplement (doi:10.5194/bg-19-715-2022), 2022-02-07
Supplement: Supplementary file 1 [file bg-19-715-2022-supplement.zip › Smithetal_WC17_supplemental_information_ReviewEdits-v2.pdf]

## **Biogeochemical controls on ammonium accumulation in the surface layer of the Southern Ocean**

Shantelle Smith<sup>1\*</sup>, Katye E. Altieri<sup>1</sup>, Mhlangabezi Mdutyana<sup>1,2</sup>, David R. Walker<sup>3</sup>, Ruan G. Parrott<sup>1</sup>, Sedick Gallie<sup>3</sup>, Kurt A.M. Spence<sup>1</sup>, Jessica M. Burger<sup>1</sup>, Sarah E. Fawcett<sup>1,4</sup>

<sup>1</sup> Department of Oceanography, University of Cape Town, Private Bag X3, Rondebosch, Cape Town, South Africa

<sup>2</sup> Southern Ocean Carbon and Climate Observatory (SOCCO), CSIR, Rosebank, Cape Town, South Africa

<sup>3</sup> Department of Conservation and Marine Sciences, Cape Peninsula University of Technology, Cape Town, South Africa

<sup>4</sup> Marine and Antarctic Research centre for Innovation and Sustainability (MARIS), University of Cape Town, Cape Town, South Africa

\* Corresponding author: [smtsha023@myuct.ac.za](mailto:smtsha023@myuct.ac.za)

### **Contents of this file**

Text S1 to S3

Table S1

Figures S1 to S6

### **Introduction**

Supporting information is provided here in the form of text, one table, and six figures. **Text S1** provides the definitions of the Southern Ocean fronts and zones used in the main text. **Text S2** gives a detailed description of the methods used to enumerate cells via flow cytometry. **Text S3** discusses the degree of coupling between net primary production (NPP) and nitrogen (N) uptake. **Table S1** shows a correlation matrix, indicating the Pearson correlation coefficient (and significance) of the relationships between each of the nutrient uptake rates, and concentrations of nitrate ( $\text{NO}_3^-$ ), ammonium ( $\text{NH}_4^+$ ), urea, bulk particulate organic nitrogen (PON), bulk particulate organic carbon (POC), and bulk chlorophyll-a (chl-a). **Figure S1** shows the cruise tracks for summer 2018/19, winter 2019, and spring 2019 overlaid on the *in situ* sea surface

temperature. **Figure S2** shows the cell sizes of the heterotroph, nanoeukaryote, picoeukaryote, and *Synechococcus* populations, as well as their autofluorescence. **Figure S3** shows surface concentrations of dissolved phosphate, silicate, and nitrite. **Figure S4** shows the bulk ( $>0.3\ \mu\text{m}$ ) particulate organic carbon and nitrogen (POC and PON) concentrations and the contribution of the nano+ ( $>2.7\ \mu\text{m}$ ) plankton size class to the bulk concentrations. **Figure S5** summarizes expands on Fig. 7 in the main text, highlighting spatial variations in the relative abundance of detritus (DNA-negative particles), photosynthetic cells, and heterotrophic cells, and their relationships to the ambient  $\text{NH}_4^+$  concentration. **Figure S6** shows the relationship between the specific rates of total N uptake (i.e., the sum of  $\text{NO}_3^-$ ,  $\text{NH}_4^+$ , and urea) and inorganic carbon fixation for the bulk and nano+ size classes in each of the Southern Ocean zones.

### **Text S1: Hydrographic fronts and zones of the Southern Ocean**

The Agulhas Front (AF) forms at the southern edge of the Agulhas Return Current in the Subtropical Zone (STZ) and is present between  $15^\circ\text{E}$  and  $70^\circ\text{E}$  (Belkin & Gordon, 1996; Lutjeharms, 1985; Lutjeharms & van Ballegooyen, 1988; Lutjeharms & Ansorge, 2001). High mesoscale activity in the STZ between the AF and Subtropical Front (STF) (Lutjeharms & Valentine, 1984) has been observed to drive elevated levels of biological activity that reaches a minimum in winter (Machu & Garçon, 2001). South of the STF, the Subantarctic Zone (SAZ) is a region of subduction where Subantarctic Mode Water (SAMW) forms (McCartney, 1977). The SAZ is bordered at its southern edge by the Subantarctic Front (SAF) that also forms the northern boundary of the Polar Frontal Zone (PFZ) (Orsi et al., 1995; Tréguer & Jacques, 1992). Antarctic Intermediate Water (AAIW) is formed in the PFZ and subducts at the SAF (Sloyan & Rintoul, 2001). The subduction of SAMW and AAIW is critical for the solubility pump (Daly et al., 2001) and global ocean fertility, with SAMW supplying nutrients to the low-latitude thermocline that support 33-75% of net community production north of  $30^\circ\text{S}$  (Marinov et al., 2006; Palter et al., 2010; Sarmiento et al., 2004; Fripiat et al. 2021). The PFZ is a transition zone between Antarctic and Subantarctic waters and is characterised by high physical variability that drives eddy formation (Emery, 1977; Gordon et al., 1977). The highly turbulent Polar Front (PF), which constitutes the southern boundary of the PFZ, can meander considerably, merging at times with the SAF (e.g., Langlais et al., 2011; Sokolov & Rintoul, 2009) and splitting in some regions into two separate fronts, the PF and the South Polar Front (SPF) (Moore et al., 1999; Pollard et al., 2002). The PF (or SPF in the case of branching) is the northern boundary of the Open Antarctic Zone (OAZ), the northern domain of the Antarctic Zone (AZ) that remains ice-free year round (Orsi et al. 1995). The OAZ is bounded to the south by the Southern Antarctic Circumpolar Current Front (SACCF), which constitutes the southern edge of the ACC core and is the only

front that is not a boundary between distinct surface water masses (Orsi et al., 1995). Instead, the SACCF denotes the southernmost extent of Upper Circumpolar Deep Water (Talley et al. 2011). South of the SACCF is the southern domain of the AZ, the Polar Antarctic Zone (PAZ), which experiences seasonal sea-ice cover (DiFiore et al., 2009). In the western Indian sector of the Southern Ocean, the PAZ encompasses the easternmost reaches of the Weddell Gyre and the Marginal Ice Zone (MIZ) (Orsi et al., 1995), where the latter lies south of the Southern Boundary (SB) of the ACC and is a biologically-active zone of partial sea-ice cover (e.g., Squire, 1998).

## **Text S2: Flow cytometry methods**

Autofluorescence was detected in the following bandpass filter sets, named for commonly-used fluorochromes: allophycocyanin (APC, 660/20), R-phycoerythrin (PE) (575/25), fluorescein isothiocyanate (FITC) (525/20), PE-cyanine 7 (PE-Cy7) (780/40), PE-Texas Red (610/20), and Pacific Blue (450/50). Background “noise” was gated out based on the forward- and side light scatter values (FSC = 800 and SSC = 200). DNA-containing cells were isolated in each sample based on their detected autofluorescence on the FITC bandpass filter (above a minimal fluorescence threshold of  $10^3$  RFU).

Based on their detected autofluorescence on the APC bandpass filter relative to the PE bandpass filter, the isolated DNA-containing cells were subsequently grouped into the following populations: Nano- and picoeukaryotes, and *Synechococcus*. Additionally, small heterotrophic cells were identified, as containing DNA but with the lowest detected autofluorescence across all bandpass filters, except the FITC (Marie et al., 1997; Gasol & del Giorgio, 2000). All particles lacking DNA were considered detritus. For each sample, data acquisition was terminated when a minimum of 5000 and maximum of 10000 events was recorded. The populations of interest were gated using FlowJo 10.3 software (TreeStar, Inc.; [www.flowjo.com](http://www.flowjo.com)).

Relative cell sizes were determined using 60  $\mu\text{L}$  of SPHERO™ Blank Calibration Particles, 1.8 – 2.2  $\mu\text{m}$  in diameter, added to 1 mL of selected samples to yield a final concentration of  $\sim 6 \times 10^5$  particles  $\text{mL}^{-1}$ . Relative to the 1.8 – 2.2  $\mu\text{m}$  calibration beads, the fixed nanoeukaryotes were larger than 2.2  $\mu\text{m}$ , picoeukaryotes and heterotrophic cells were smaller than 1.8  $\mu\text{m}$ , and *Synechococcus* exhibited a range of sizes around 2  $\mu\text{m}$ , with two distinct subgroups; one of  $\sim 2$   $\mu\text{m}$  in size and another slightly larger than 2.2  $\mu\text{m}$  (see Fig. S2). *Synechococcus* was isolated from the nanoeukaryotes by its pigment characteristics – both subgroups of *Synechococcus* had high PE relative to APC content (Barlow et al., 1985; Marie et al., 1997), whereas nanoeukaryotes had high APC and PE. The “true” sizes of the phytoplankton cells may have been greater than

those reported here as post-collection fixation of samples with glutaraldehyde can lead to cell shrinkage, as well as cell lysis (Eckford-Soper & Daugbjerg, 2015).

### Text S3: Coupling of NPP and N uptake

The specific carbon fixation rate ( $V_C$ ) was calculated as  $\rho C/[POC]$  and the specific uptake rate of total N ( $V_{N_{tot}}$ ) was calculated as  $\rho N_{tot}/[PON]$  (where  $\rho N_{tot} = \rho NH_4^+ + \rho NO_3^- + \rho Urea$ ). No urea uptake experiments were conducted at the underway stations at 50.7°S and 55.5°S (both AZ); here,  $V_{N_{tot}}$  was calculated omitting  $V_{urea}$ .

Plotting the specific rate of total dissolved N uptake ( $V_{N_{tot}}$ ) against that of inorganic carbon fixation ( $V_C$ ) at each station provides a means of assessing the coupling between autotrophic N consumption and primary production (Fig. S7). If the data fall on a 1:1 line in this space, the implications are that 1) primary production is well represented by total N uptake (i.e., we have not overlooked a potentially significant N source to phytoplankton in designing our experiments), and 2) all measured N uptake can be attributed to phytoplankton. Deviations from the 1:1 relationship can thus provide information about the biogeochemical functioning of the plankton system (Flynn et al., 2018; Mdutyana et al., 2020; Peng et al., 2018).

The bulk specific rates at the AZ stations fall slightly above the 1:1 line, with  $V_{N_{tot}} > V_C$  (circles in Fig. S7). This can be interpreted to evince assimilation of dissolved N (likely  $NH_4^+$  and/or urea) by heterotrophic bacteria, which would occur in the absence of carbon fixation. Indeed, significant rates of  $NH_4^+$  uptake by heterotrophic bacteria have been inferred previously for the winter Southern Ocean from a decoupling of NPP and total N uptake (Mdutyana et al., 2020). Values of  $V_{N_{tot}}$  in excess of  $V_C$  could alternately be due to the stimulation of phytoplankton  $NH_4^+$  uptake (to values in excess of the “true” *in situ* rates) following  $^{15}NH_4^+$  tracer addition (Lipschultz, 2008). However, the ambient  $NH_4^+$  concentrations in the AZ were the highest of the transect, and  $^{15}NH_4^+$  was added at 10-20% of these ambient concentrations, which is unlikely to have stimulated  $V_{NH_4}$ . See also section 3.2.6 of the main text

For the STZ stations, the bulk values of  $V_C$  considerably exceed  $V_{N_{tot}}$  (triangles in Fig. S7). One interpretation of such a deviation is that some fraction of the measured NPP was supported by an N source that we did not account for (Mdutyana et al., 2020; Peng et al., 2018). However,  $V_{N_{tot}}$  in the STZ includes  $NO_3^-$ ,  $NH_4^+$ , and urea uptake, the three species that typically fuel nearly all phytoplankton growth. A further potential N source is  $N_2$  fixation, but the available data suggest that this process is very limited in the open subtropical South Atlantic (Mather et al., 2008; Moore

et al., 2009), as is atmospheric N deposition (Baker et al., 2003; Jickells et al., 2016; Yan et al., 2013). An alternate possibility, as has been suggested for oligotrophic subtropical waters (Fawcett et al., 2018), is that phytoplankton growing under nutrient-limited conditions fix carbon in excess of their stoichiometric requirements (and thus in excess of  $V_{N_{tot}}$ ) and then exude it into the environment where it will ultimately contribute to the formation of transparent exopolymer particles (TEP; Alldredge et al., 1993; Chin et al., 1998; Corzo et al., 2000; Engel, 2004; Mari et al., 2017). While we cannot rule out this possibility, particularly given that phytoplankton were probably iron-limited at the time of sampling, the macronutrient concentrations at the STZ stations ( $NO_3^-$  of 2.4-3.4  $\mu M$  and  $PO_4^{3-}$  of 0.39-0.49  $\mu M$ ; Fig. 2c) were unlikely to be limiting to subtropical phytoplankton. A perhaps more plausible explanation, therefore, is that the apparent surface decoupling of  $V_C$  and  $V_{N_{tot}}$  is an artefact of our sampling design insofar as it may not hold over the entire mixed layer given the far stronger light dependence of photosynthesis (i.e.,  $V_C$ ) compared to inorganic N uptake (particularly  $NH_4^+$  and urea; Dortch, 1990). In other words, if we had depth-resolved data, mixed-layer integrated  $V_C$  and  $V_{N_{tot}}$  may not be decoupled.

## Tables

*Table S1:* Correlation matrix of leg S and N surface ocean concentrations of bulk PON, bulk POC, bulk chl-a,  $NH_4^+$ ,  $NO_3^-$ , and urea, and rates of net primary production (NPP), N uptake (as  $NH_4^+$ ,  $NO_3^-$ , and urea), f-ratio (excluding  $\rho Urea$ ), and  $NH_4^+$  oxidation. \*, \*\*, \*\*\*, and \*\*\*\* indicate levels of significance of the Pearson correlation coefficients of 0.05, 0.01, 0.001, and 0.0001, respectively.

## Figures

*Figure S1:* Cruise tracks for a) summer 2018-2019, b) winter 2019, and c) spring 2019 overlaid on sea surface temperature (SST) measured by the ship's thermosalinograph. Solid lines indicate the positions of the fronts. Abbreviations for zones: STZ – Subtropical Zone; SAZ – Subantarctic Zone; PFZ – Polar Frontal Zone; AZ – Antarctic Zone. Figure produced using the package ggplot2 (Wickham, 2016).

*Figure S2:* Size distributions (inferred from forward scatter area, FSC-A) of a) heterotrophic bacteria, c) nanoeukaryotes, e) picoeukaryotes, and g) *Synechococcus* relative to SPHERO™ Blank Calibration Particles (1.8 – 2.2  $\mu m$  in diameter; indicated by the red band), and cytograms showing allophycocyanin content (APC-A) relative to phycoerythrin content (PE-A) for the

populations of b) heterotrophic bacteria, d) nanoeukaryotes, f) picoeukaryotes, and h) *Synechococcus*.

*Figure S3:* Surface concentrations of dissolved a) phosphate ( $\text{PO}_4^{3-}$ ), b) silicate ( $\text{Si}(\text{OH})_4$ ), and c) nitrite ( $\text{NO}_2^-$ ) during Legs S and N. Abbreviations for zones are as in Figure S1, with the addition of OAZ – Open Antarctic Zone; PAZ – Polar Antarctic Zone (collectively, the AZ). Abbreviations for fronts: AF – Agulhas Front; STF – Subtropical Front; SAF – Subantarctic Front; PF – Polar Front; SACCF – Southern Antarctic Circumpolar Current Front; SBDY – Southern Boundary. Figures produced using the package ggplot2 (Wickham, 2016).

*Figure S4:* Leg S and N surface ocean concentrations of bulk ( $>0.3 \mu\text{m}$ ) a) POC and b) PON, and nano+ ( $>2.7 \mu\text{m}$ ) plankton contributions (%) to bulk c) POC and d) PON. Note that the colour scales in panels c and d have been skewed to show 50 to 100% since the nano+ size class is dominant across the transect. Only stations where PON and POC concentrations for the nano+ size class were measured are shown in panels c and d (black circles). Station  $58.5^\circ\text{S}$ , where the nano+ contribution was  $>100\%$  of the corresponding bulk PON concentration, likely due to a measurements artefact, was excluded from panel d. Abbreviations are as in Figure S1 and S3. Figure produced using the package ggplot2 (Wickham, 2016).

*Figure S5:* Relative abundances of a) total photosynthetic versus heterotrophic bacteria and b) detritus versus heterotrophic bacteria at the surface for Leg S. The surface  $\text{NH}_4^+$  concentration at each station is indicated by the yellow dots. The values in maroon text on the right side of panel a are the photosynthetic-to-heterotrophic cell ratios. The upper x-axis in panel b begins at 75% in order to highlight the (much smaller) heterotrophic bacterial contribution to the summed detrital + heterotrophic particles. Frontal abbreviations are as in Figure S1 and S3.

*Figure S6:* Specific rates of total nitrogen uptake ( $V_{\text{N}_{\text{tot}}} = \rho\text{N}_{\text{tot}} / [\text{PON}]$ ) relative to carbon fixation ( $V_{\text{C}} = \text{NPP} / [\text{POC}]$ ). Error bars represent  $\pm 1$  standard error for duplicate experiments, with error propagated according to standard statistical practices. Light grey error bars are associated with values calculated by subtraction ( $0.3\text{-}2.7 \mu\text{m}$  (i.e., pico) size class) and black error bars indicate the error for experimental duplicates. The specific rates are shown in relation to a 1:1 line, on which the data points are expected to fall if NPP is supported by the sum of  $\text{NO}_3^-$ ,  $\text{NH}_4^+$ , and urea uptake. Circles indicate AZ stations (OAZ and PAZ), squares indicate PFZ stations, diamonds indicate SAZ stations, and open triangles indicate STZ stations. Open symbols are used for the STZ to differentiate them from “true” Southern Ocean samples. Dotted circles indicate samples where no  $V_{\text{urea}}$  was measured. Figure produced using the package ggplot2 (Wickham, 2016).

## Supplemental references cited

- Allredge, A. L., Passow, U., and Logan, B. E.: The abundance and significance of a class of large, transparent organic particles in the ocean, *Deep-Sea Res Pt I*, 40, 1131–1140, [https://doi.org/10.1016/0967-0637\(93\)90129-q](https://doi.org/10.1016/0967-0637(93)90129-q), 1993.
- Baker, A. R., Kelly, S. D., Biswas, K. F., Witt, M., and Jickells, T. D.: Atmospheric deposition of nutrients to the Atlantic Ocean, *Geophys Res Lett*, 30, <https://doi.org/10.1029/2003gl018518>, 2003.
- Barlow, R. G. and Alberte, R. S.: Photosynthetic characteristics of phycoerythrin-containing marine *Synechococcus* spp, *Mar Biol*, 86, 63–74, <https://doi.org/10.1007/bf00392580>, 1985.
- Belkin, I. M. and Gordon, A. L.: Southern Ocean fronts from the Greenwich meridian to Tasmania, *J Geophys Res-Oceans*, 101, 3675–3696, <https://doi.org/10.1029/95jc02750>, 1996.
- Bianchi, M., Feliatra, F., Tréguer, P., Vincendeau, M. A., and Morvan, J.: Nitrification rates, ammonium and nitrate distribution in upper layers of the water column and in sediments of the Indian sector of the Southern Ocean, *Deep-Sea Res Pt II*, 44, 1017–1032, [https://doi.org/10.1016/s0967-0645\(96\)00109-9](https://doi.org/10.1016/s0967-0645(96)00109-9), 1997.
- Chin, W. C., Orellana, M. V., and Verdugo, P.: Spontaneous assembly of marine dissolved organic matter into polymer gels, *Nature*, 391, 568–572, <https://doi.org/10.1038/35345>, 1998.
- Corzo, A., Morillo, J. A., and Rodríguez, S.: Production of transparent exopolymer particles (TEP) in cultures of *Chaetoceros calcitrans* under nitrogen limitation, *Aquat Microb Ecol*, 23, 63–72, <https://doi.org/10.3354/ame023063>, 2000.
- Daly, K. L., Smith, W. O., Johnson, G. C., DiTullio, G. R., Jones, D. R., Mordy, C. W., Feely, R. A., Hansell, D. A., and Zhang, J.-Z.: Hydrography, nutrients, and carbon pools in the Pacific sector of the Southern Ocean: Implications for carbon flux, *J Geophys Res-Oceans*, 106, 7107–7124, <https://doi.org/10.1029/1999jc000090>, 2001.
- DiFiore, P. J., Sigman, D. M., and Dunbar, R. B.: Upper ocean nitrogen fluxes in the Polar Antarctic Zone: Constraints from the nitrogen and oxygen isotopes of nitrate, *Geochem Geophys Geosy*, 10, Q11016, <http://dx.doi.org/10.1029/2009GC002468>, 2009.
- Dortch, Q.: The interaction between ammonium and nitrate uptake in phytoplankton, *Mar Ecol Prog Ser*, 61, 183–201, <https://doi.org/10.3354/meps061183>, 1990.
- Eckford-Soper, L. K. and Daugbjerg, N.: Examination of six commonly used laboratory fixatives in HAB monitoring programs for their use in quantitative PCR based on Taqman probe technology, *Harmful Algae*, 42, 52–59, <https://doi.org/10.1016/j.hal.2014.12.007>, 2015.
- Emery, W. J.: Antarctic polar frontal zone from Australia to the Drake Passage, *J Phys Oceanogr*, 7, 811–822, [https://doi.org/10.1175/1520-0485\(1977\)007<0811:apzf>2.0.co;2](https://doi.org/10.1175/1520-0485(1977)007<0811:apzf>2.0.co;2), 1977.
- Engel, A.: Distribution of transparent exopolymer particles (TEP) in the northeast Atlantic Ocean and their potential significance for aggregation processes, *Deep-Sea Res Pt I*, 51, 83–92, <https://doi.org/10.1016/j.dsr.2003.09.001>, 2004.
- Fawcett, S. E., Johnson, K. S., Riser, S. C., Van Oostende, N., and Sigman, D. M.: Low-nutrient organic matter in the Sargasso Sea thermocline: a hypothesis for its role, identity, and carbon cycle implications, *Mar Chem*, 207, 108–123, <https://doi.org/10.1016/j.marchem.2018.10.008>, 2018.
- Flynn, R. F., Burger, J. M., Pillay, K., and Fawcett, S. E.: Wintertime rates of net primary production and nitrate and ammonium uptake in the southern Benguela upwelling system, *Afr J Mar Sci*, 40, 253–266, <https://doi.org/10.2989/1814232x.2018.1502095>, 2018.
- Gasol, J. M. and Giorgio, P. A.: Using flow cytometry for counting natural planktonic bacteria and understanding the structure of planktonic bacterial communities, *Sci Mar*, 64, 197–224, <https://doi.org/10.3989/scimar.2000.64n2197>, 2000.

Goeyens, L., Tréguer, P., Lancelot, C., Mathot, S., Becquevort, S., Morvan, J., Dehairs, F., and Baeyens, W.: Ammonium regeneration in the Scotia-Weddell Confluence area during spring 1988, *Mar Ecol Prog Ser*, 78, 241-252, <http://dx.doi.org/10.3354/meps078241>, 1991.

Gordon, A. L., Georgi, D. T., and Taylor, H. W.: Antarctic polar front zone in the western Scotia Sea—Summer 1975, *J Phys Oceanogr*, 7, 309–328, [https://doi.org/10.1175/1520-0485\(1977\)007<0309:apfzit>2.0.co;2](https://doi.org/10.1175/1520-0485(1977)007<0309:apfzit>2.0.co;2), 1977.

Jickells, T. D., Baker, A. R., and Chance, R.: Atmospheric transport of trace elements and nutrients to the oceans, *Philos T R Soc A*, 374, 20150286, <https://doi.org/10.1098/rsta.2015.0286>, 2016.

Kang, Y., Pan, D., Bai, Y., He, X., Chen, X., Chen, C. T. A., and Wang, D.: Areas of the global major river plumes, *Acta Oceanol Sin*, 32, 79–88, <https://doi.org/10.1007/s13131-013-0269-5>, 2013.

Langlais, C., Rintoul, S., and Schiller, A.: Variability and mesoscale activity of the Southern Ocean fronts: Identification of a circumpolar coordinate system, *Ocean Model*, 39, 79–96, <https://doi.org/10.1016/j.ocemod.2011.04.010>, 2011.

Lipschultz, F.: Isotope tracer methods for studies of the marine nitrogen cycle, in: *Nitrogen in the Marine Environment*, 2nd ed., edited by: Capone, D. G., Bronk, D. A., Mulholland, M. R. and Carpenter, E. J., Academic Press, Burlington, Massachusetts, United States of America, <http://dx.doi.org/10.1016/B978-0-12-372522-6.00031-1>, 2008.

Lutjeharms, J. R. E. and Ansorge, I. J.: The Agulhas return current, *J Marine Syst*, 30, 115–138, [https://doi.org/10.1016/s0924-7963\(01\)00041-0](https://doi.org/10.1016/s0924-7963(01)00041-0), 2001.

Lutjeharms, J. R. E. and Valentine, H. R.: Southern ocean thermal fronts south of Africa, *Deep-Sea Res*, 31, 1461–1475, [https://doi.org/10.1016/0198-0149\(84\)90082-7](https://doi.org/10.1016/0198-0149(84)90082-7), 1984.

Lutjeharms, J. R. E. and Van Ballegooyen, R. C.: Anomalous upstream retroflexion in the Agulhas Current, *Science*, 240, 1770–1770, <https://doi.org/10.1126/science.240.4860.1770>, 1988.

Lutjeharms, J. R. E., Walters, N. M., and Allanson, B. R.: Oceanic frontal systems and biological enhancement, *Antarctic Nutrient Cycles and Food Webs*, 11–21, [https://doi.org/10.1007/978-3-642-82275-9\\_3](https://doi.org/10.1007/978-3-642-82275-9_3), 1985.

Machu, E. and Garçon, V.: Phytoplankton seasonal distribution from SeaWiFS data in the Agulhas Current system, *J Mar Res*, 59, 795–812, <https://doi.org/10.1357/002224001762674944>, 2001.

Mari, X., Passow, U., Migon, C., Burd, A. B., and Legendre, L.: Transparent exopolymer particles: Effects on carbon cycling in the ocean, *Prog Oceanogr*, 151, 13–37, <https://doi.org/10.1016/j.pocean.2016.11.002>, 2017.

Marie, D., Partensky, F., Jacquet, S., and Vaultot, D.: Enumeration and cell cycle analysis of natural populations of marine picoplankton by flow cytometry using the nucleic acid stain SYBR Green I, *Appl Environ Microbiol*, 63, 186–193, <https://doi.org/10.1128/aem.63.1.186-193.1997>, 1997.

Marinov, I., Gnanadesikan, A., Toggweiler, J. R., and Sarmiento, J. L.: The southern ocean biogeochemical divide, *Nature*, 441, 964–967, <https://doi.org/10.1038/nature04883>, 2006.

Mather, R. L., Reynolds, S. E., Wolff, G. A., Williams, R. G., Torres-Valdes, S., Woodward, E. M. S., Landolfi, A., Pan, X., Sanders, R., and Achterberg, E. P.: Phosphorus cycling in the North and South Atlantic Ocean subtropical gyres, *Nature Geosci*, 1, 439–443, <https://doi.org/10.1038/ngeo232>, 2008.

McCartney, M. S.: Subantarctic mode water, *Woods Hole Oceanographic Institution Contribution*, 3773, 103–119, 1979.

Mdutyana, M., Thomalla, S. J., Philibert, R., Ward, B. B., and Fawcett, S. E.: The seasonal cycle of nitrogen uptake and nitrification in the Atlantic sector of the Southern Ocean, *Glob Biogeochem Cy*, 34, 2019 006363, <https://doi.org/10.1029/2019gb006363>, 2020.

Moore, C. M., Mills, M. M., Achterberg, E. P., Geider, R. J., LaRoche, J., Lucas, M. I., McDonagh, E. L., Pan, X., Poulton, A. J., Rijkenberg, M. J., and Suggett, D. J.: Large-scale distribution of Atlantic nitrogen fixation controlled by iron availability, *Nature Geosci*, 2, 867–871, <https://doi.org/10.1038/ngeo667>, 2009.

- Moore, J. K., Abbott, M. R., and Richman, J. G.: Location and dynamics of the Antarctic Polar Front from satellite sea surface temperature data, *J Geophys Res-Oceans*, 104, 3059–3073, <https://doi.org/10.1029/1998jc900032>, 1999.
- Orsi, A. H., Whitworth, T., and Nowlin, W. D.: On the meridional extent and fronts of the Antarctic Circumpolar Current, *Deep-Sea Res Pt I*, 42, 641–673, [https://doi.org/10.1016/0967-0637\(95\)00021-w](https://doi.org/10.1016/0967-0637(95)00021-w), 1995.
- Palter, J. B., Sarmiento, J. L., Gnanadesikan, A., Simeon, J., and Slater, R. D.: Fueling export production: nutrient return pathways from the deep ocean and their dependence on the Meridional Overturning Circulation, *Biogeosciences*, 7, 3549–3568, <https://doi.org/10.5194/bg-7-3549-2010>, 2010.
- Peng, X., Fawcett, S. E., Van Oostende, N., Wolf, M. J., Marconi, D., Sigman, D. M., and Ward, B. B.: Nitrogen uptake and nitrification in the subarctic North Atlantic Ocean, *Limnol Oceanogr*, 63, 1462–1487, <https://doi.org/10.1002/lno.10784>, 2018.
- Pollard, R. T., Lucas, M. I., and Read, J. F.: Physical controls on biogeochemical zonation in the Southern Ocean, *Deep-Sea Res Pt II*, 49, 3289–3305, [https://doi.org/10.1016/s0967-0645\(02\)00084-x](https://doi.org/10.1016/s0967-0645(02)00084-x), 2002.
- Sarmiento, J. L., Gruber, N., Brzezinski, M. A., and Dunne, J. P.: High-latitude controls of thermocline nutrients and low latitude biological productivity, *Nature*, 427, 56–60, <https://doi.org/10.1038/nature02127>, 2004.
- Sloyan, B. M. and Rintoul, S. R.: Circulation, renewal, and modification of Antarctic Mode and Intermediate Water, *J Phys Oceanogr*, 31, 1005–1030, [https://doi.org/10.1175/1520-0485\(2001\)031<1005:cramoa>2.0.co;2](https://doi.org/10.1175/1520-0485(2001)031<1005:cramoa>2.0.co;2), 2001.
- Sokolov, S. and Rintoul, S. R.: On the relationship between fronts of the Antarctic Circumpolar Current and surface chlorophyll concentrations in the Southern Ocean, *J Geophys Res-Oceans*, 112, C07030, <https://doi.org/10.1029/2006JC004072>, 2007.
- Squire, V. A.: The marginal ice zone, in: *Physics of Ice-Covered Seas*, edited by: Lepparanta, M., Helsinki University Printing House, Helsinki, Finland, 381–446, 1998.
- Tréguer, P. and Jacques, G.: Review Dynamics of nutrients and phytoplankton, and fluxes of carbon, nitrogen and silicon in the Antarctic Ocean, in: *Weddell Sea Ecology*, edited by: Hempel, G., Springer, Berlin, Heidelberg, 149–162, <https://doi.org/10.1007/978-3-642-77595-6>, 1992.
