# Supplementary figures and images for: Biogeochemical controls on ammonium accumulation in the surface layer of the Southern Ocean
Source: Copernicus journal article supplement (doi:10.5194/bg-19-715-2022), 2022-02-07

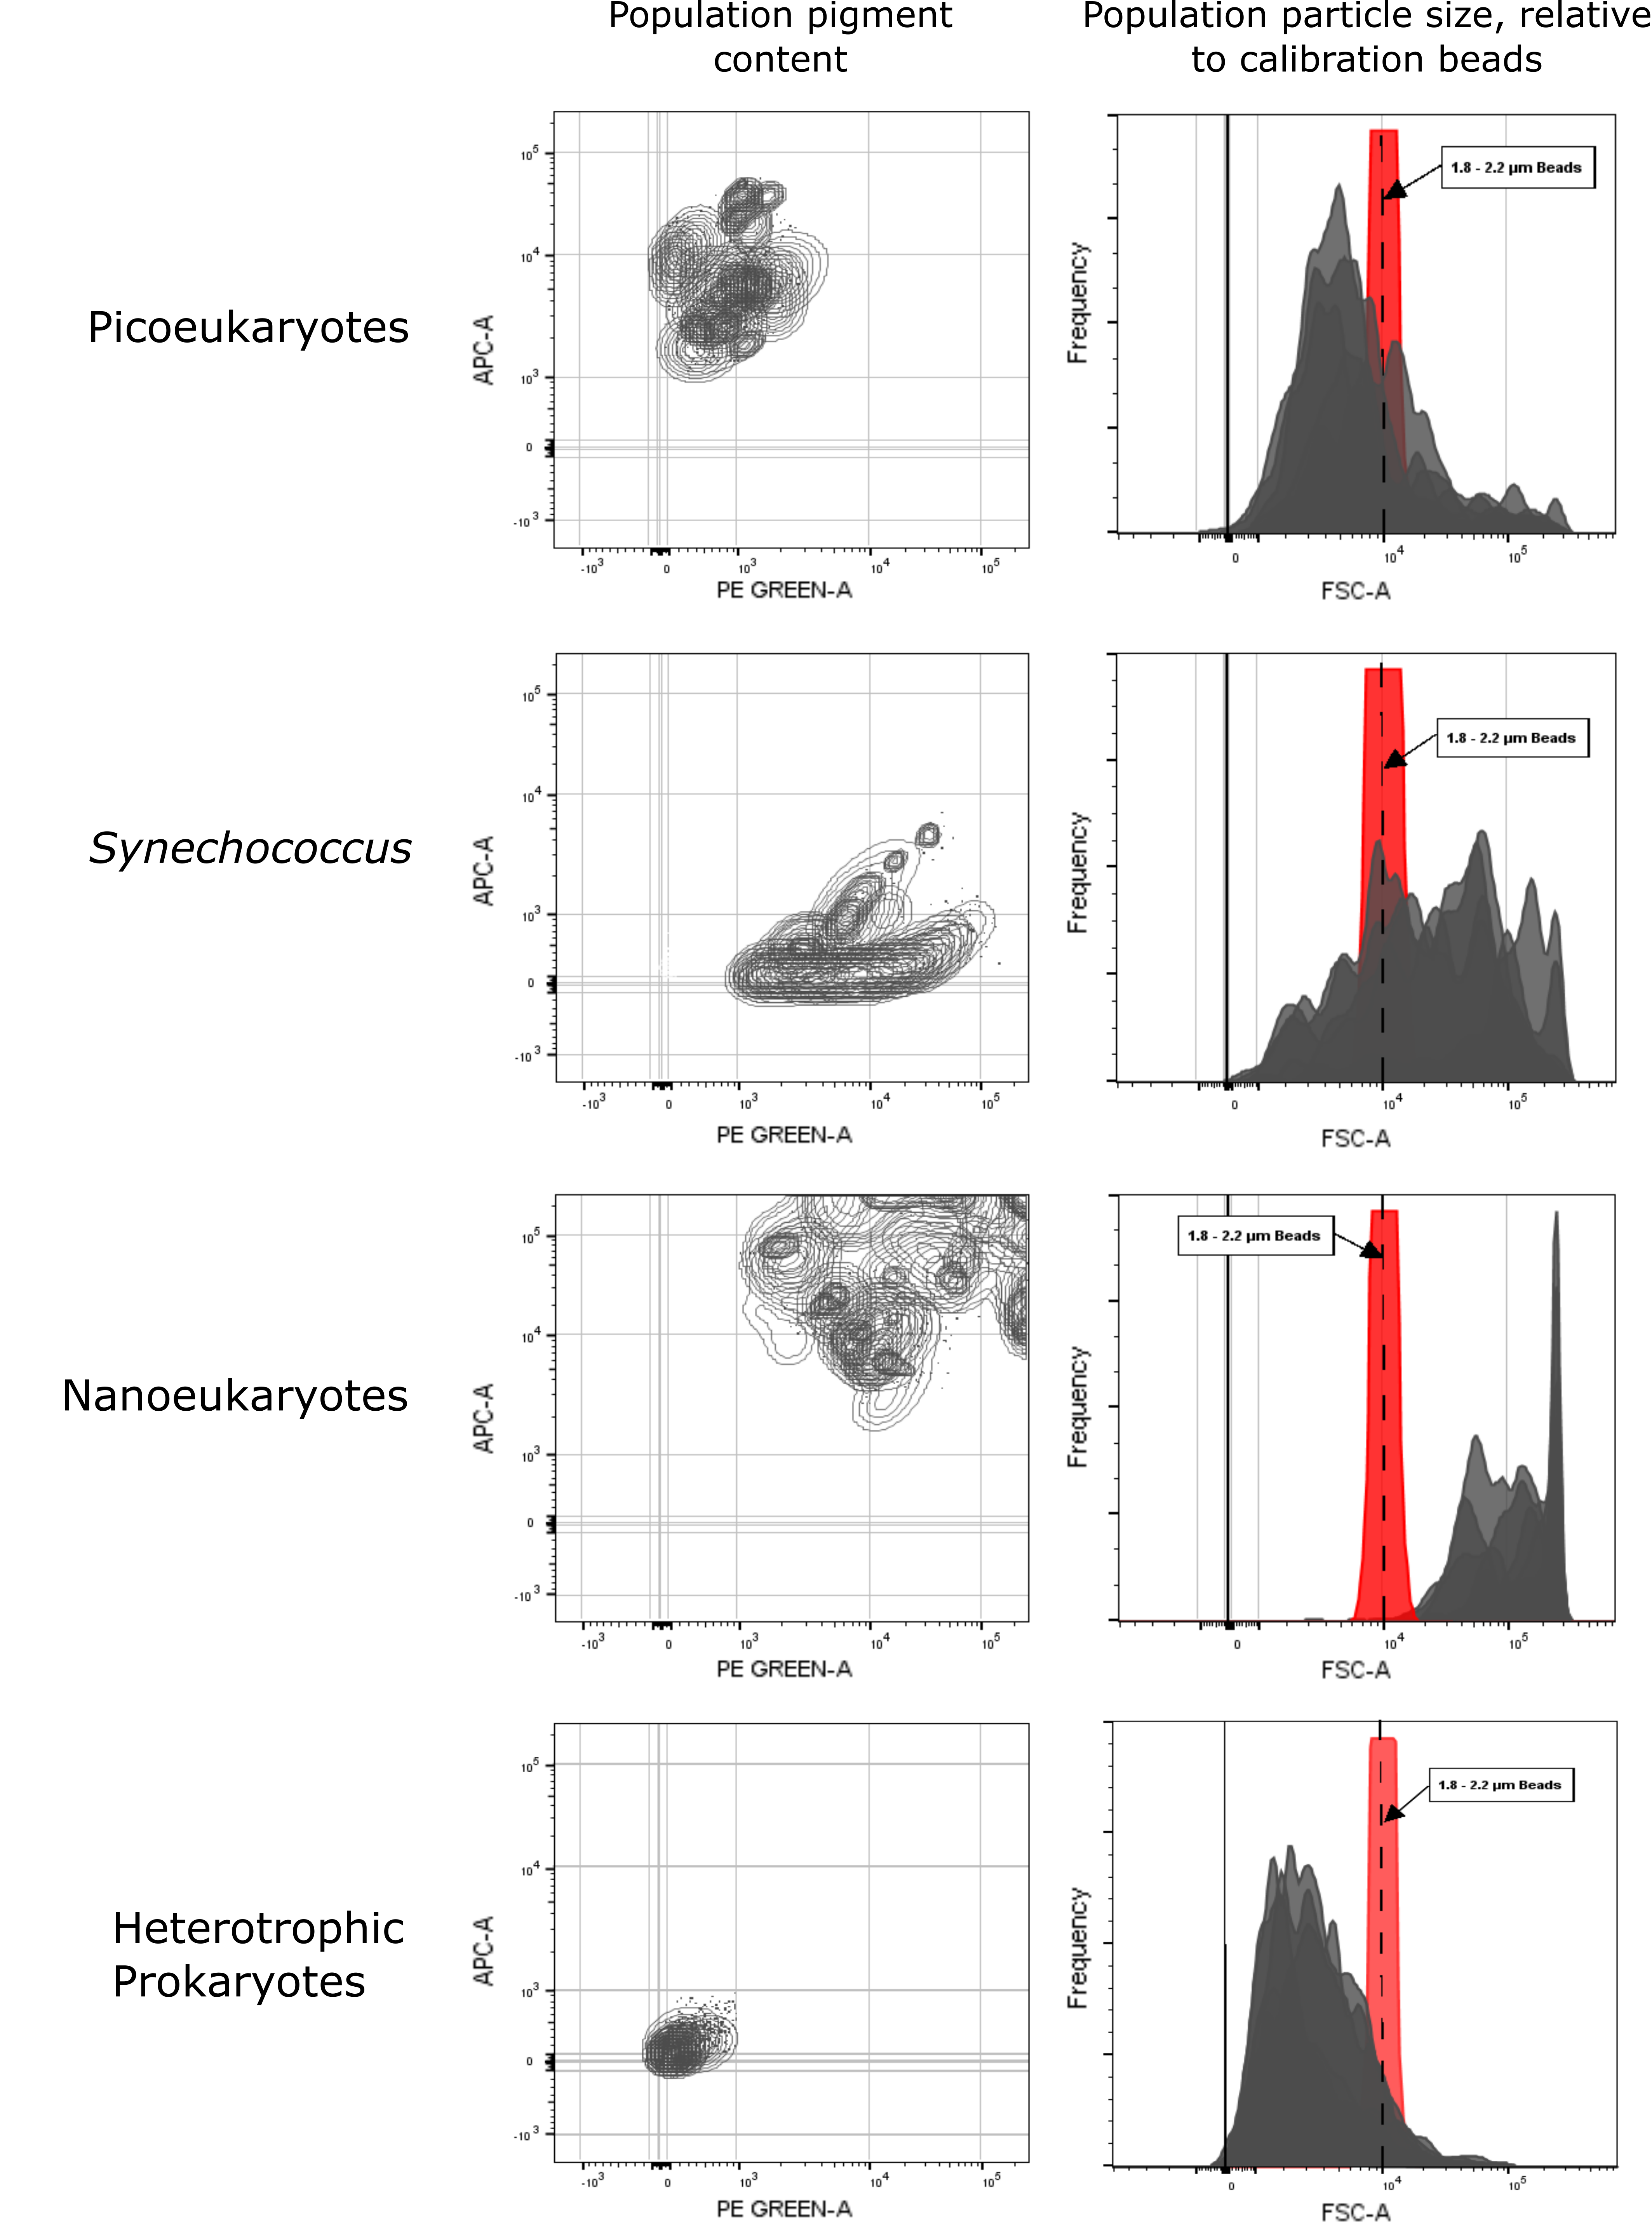

Supplement: Supplementary file 1 [file bg-19-715-2022-supplement.zip › wc17FigureS2.png]

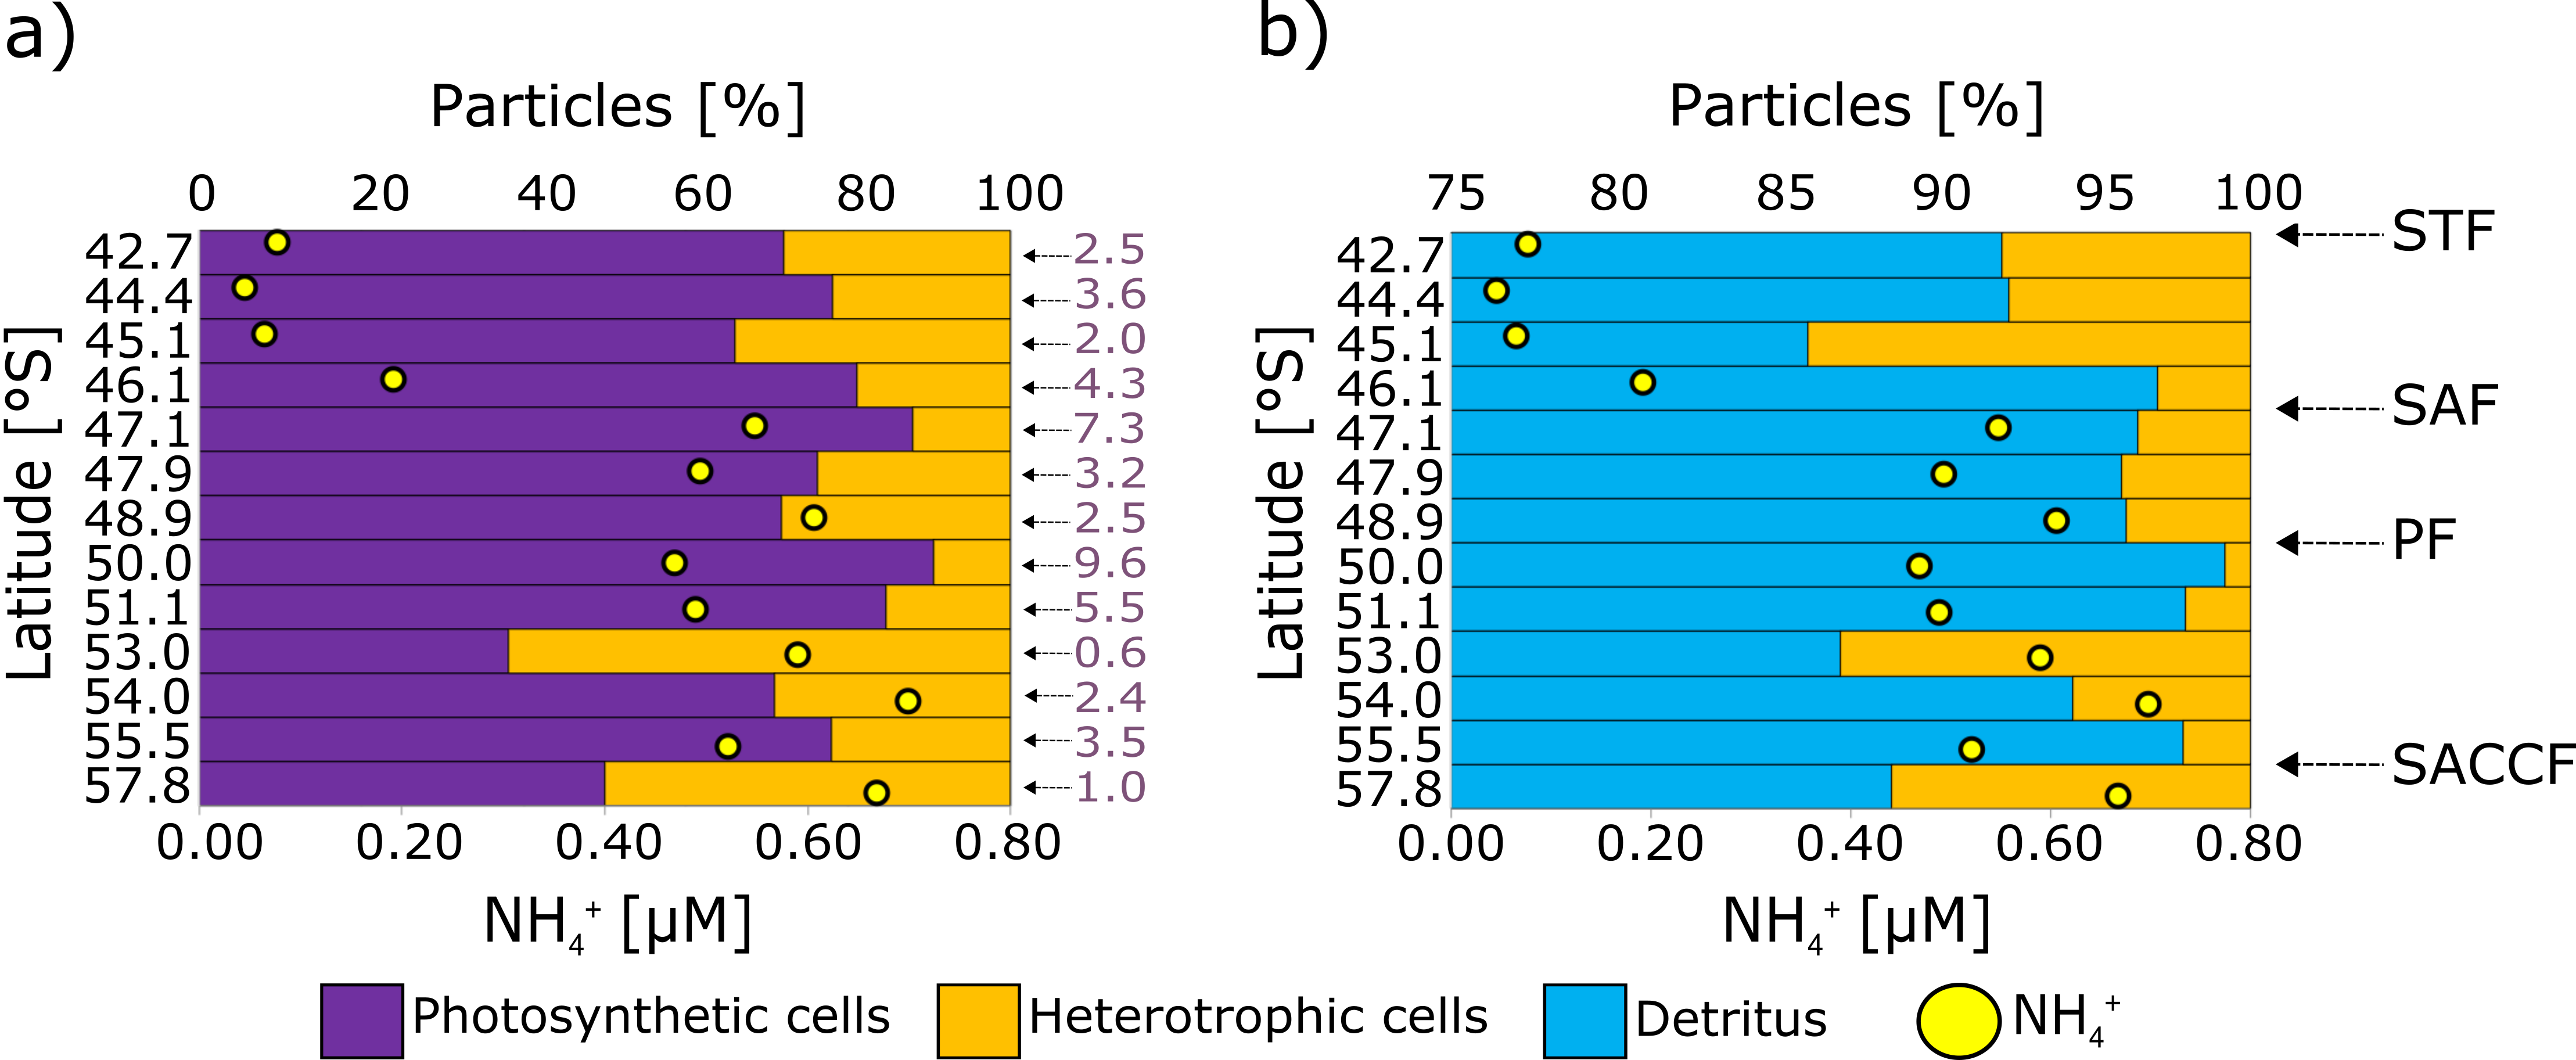

Supplement: Supplementary file 1 [file bg-19-715-2022-supplement.zip › wc17_figureS5_revised.png]

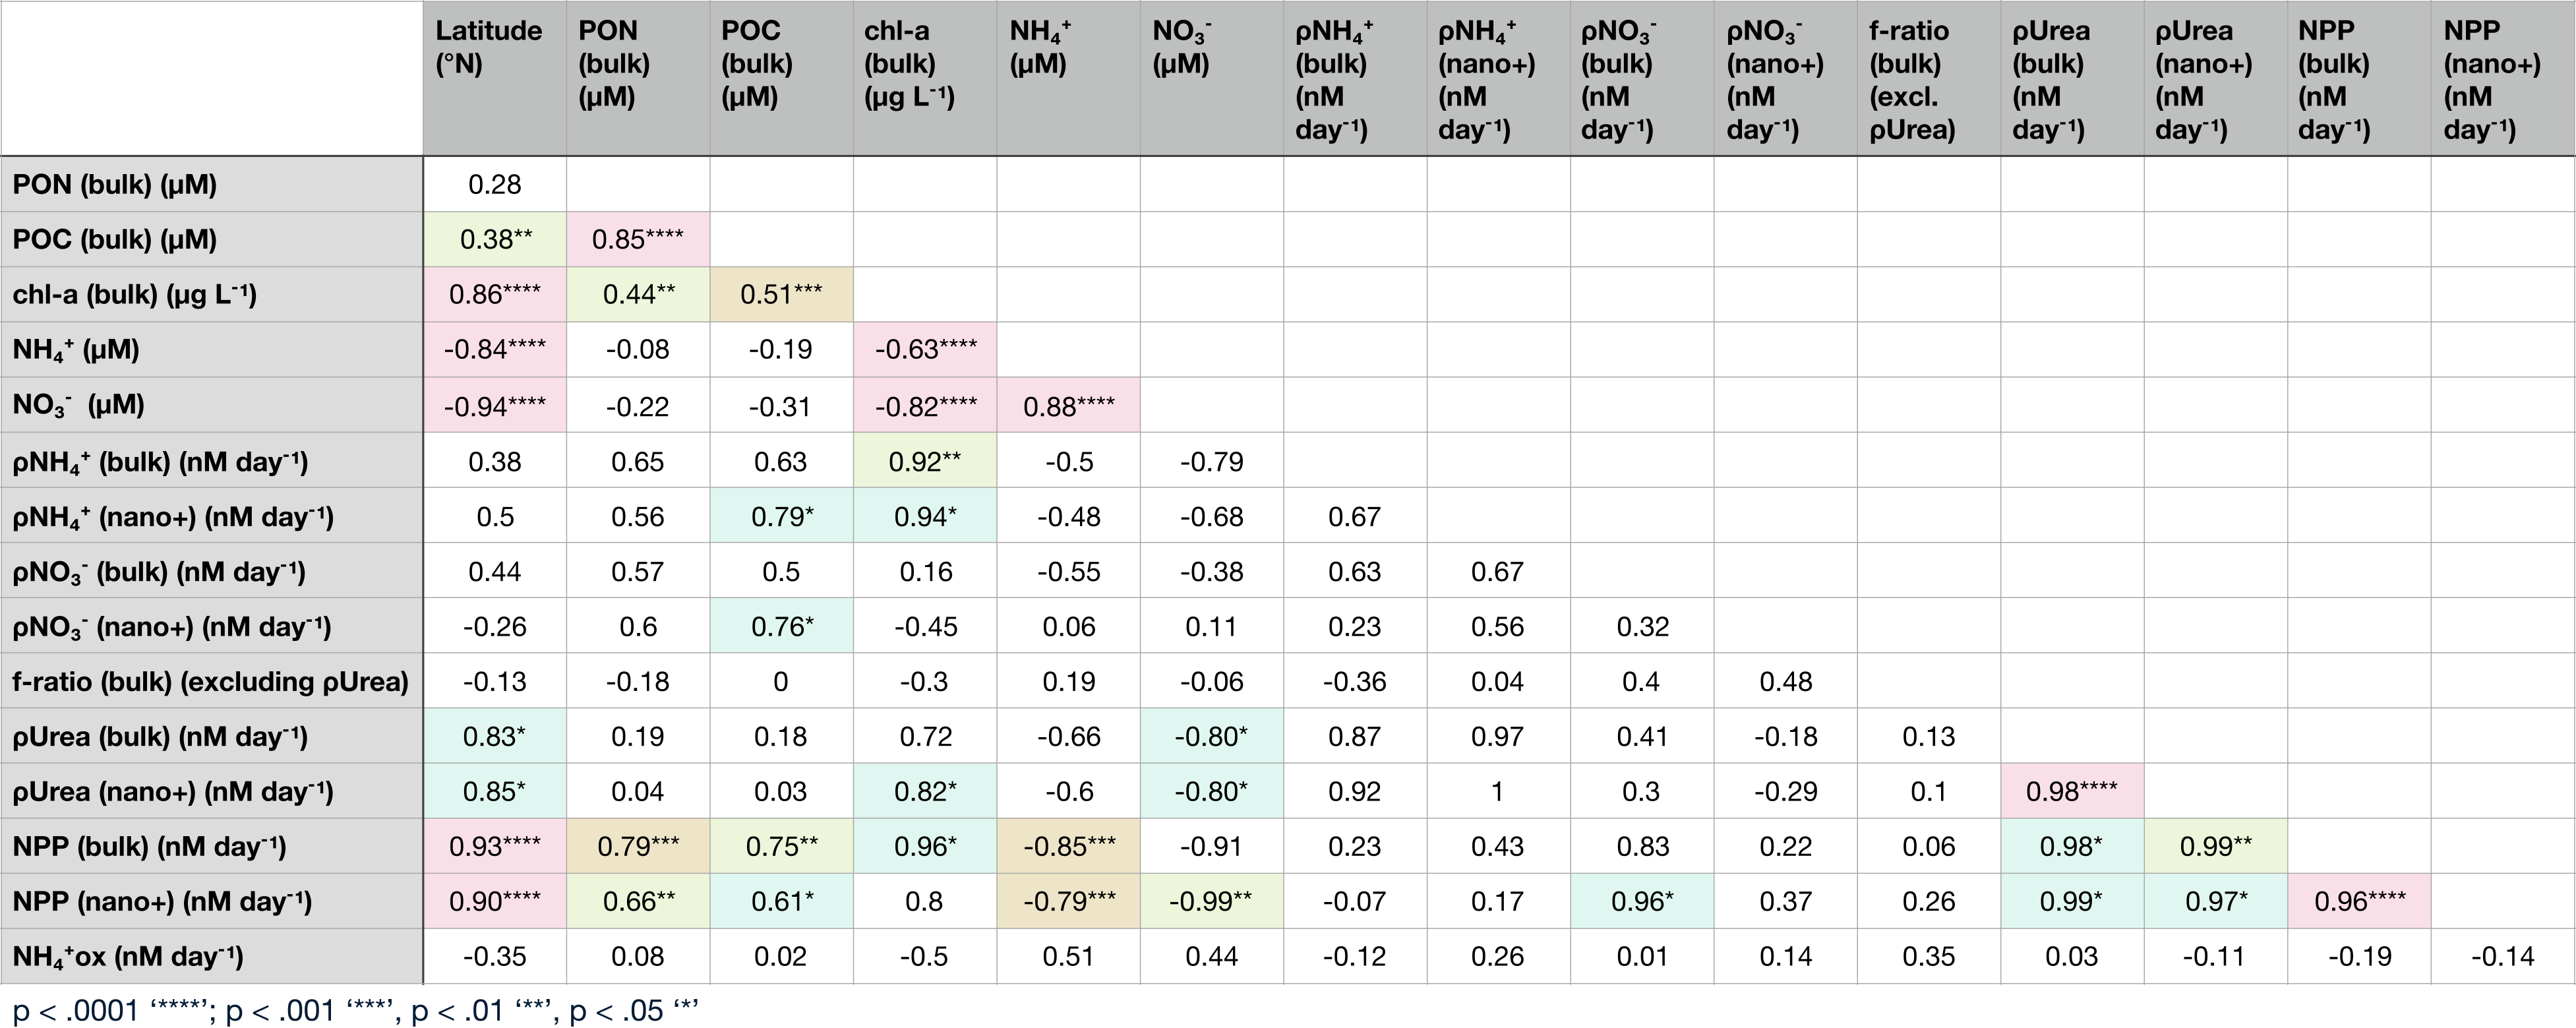

Supplement: Supplementary file 1 [file bg-19-715-2022-supplement.zip › tableS1_corrmatrix.png]

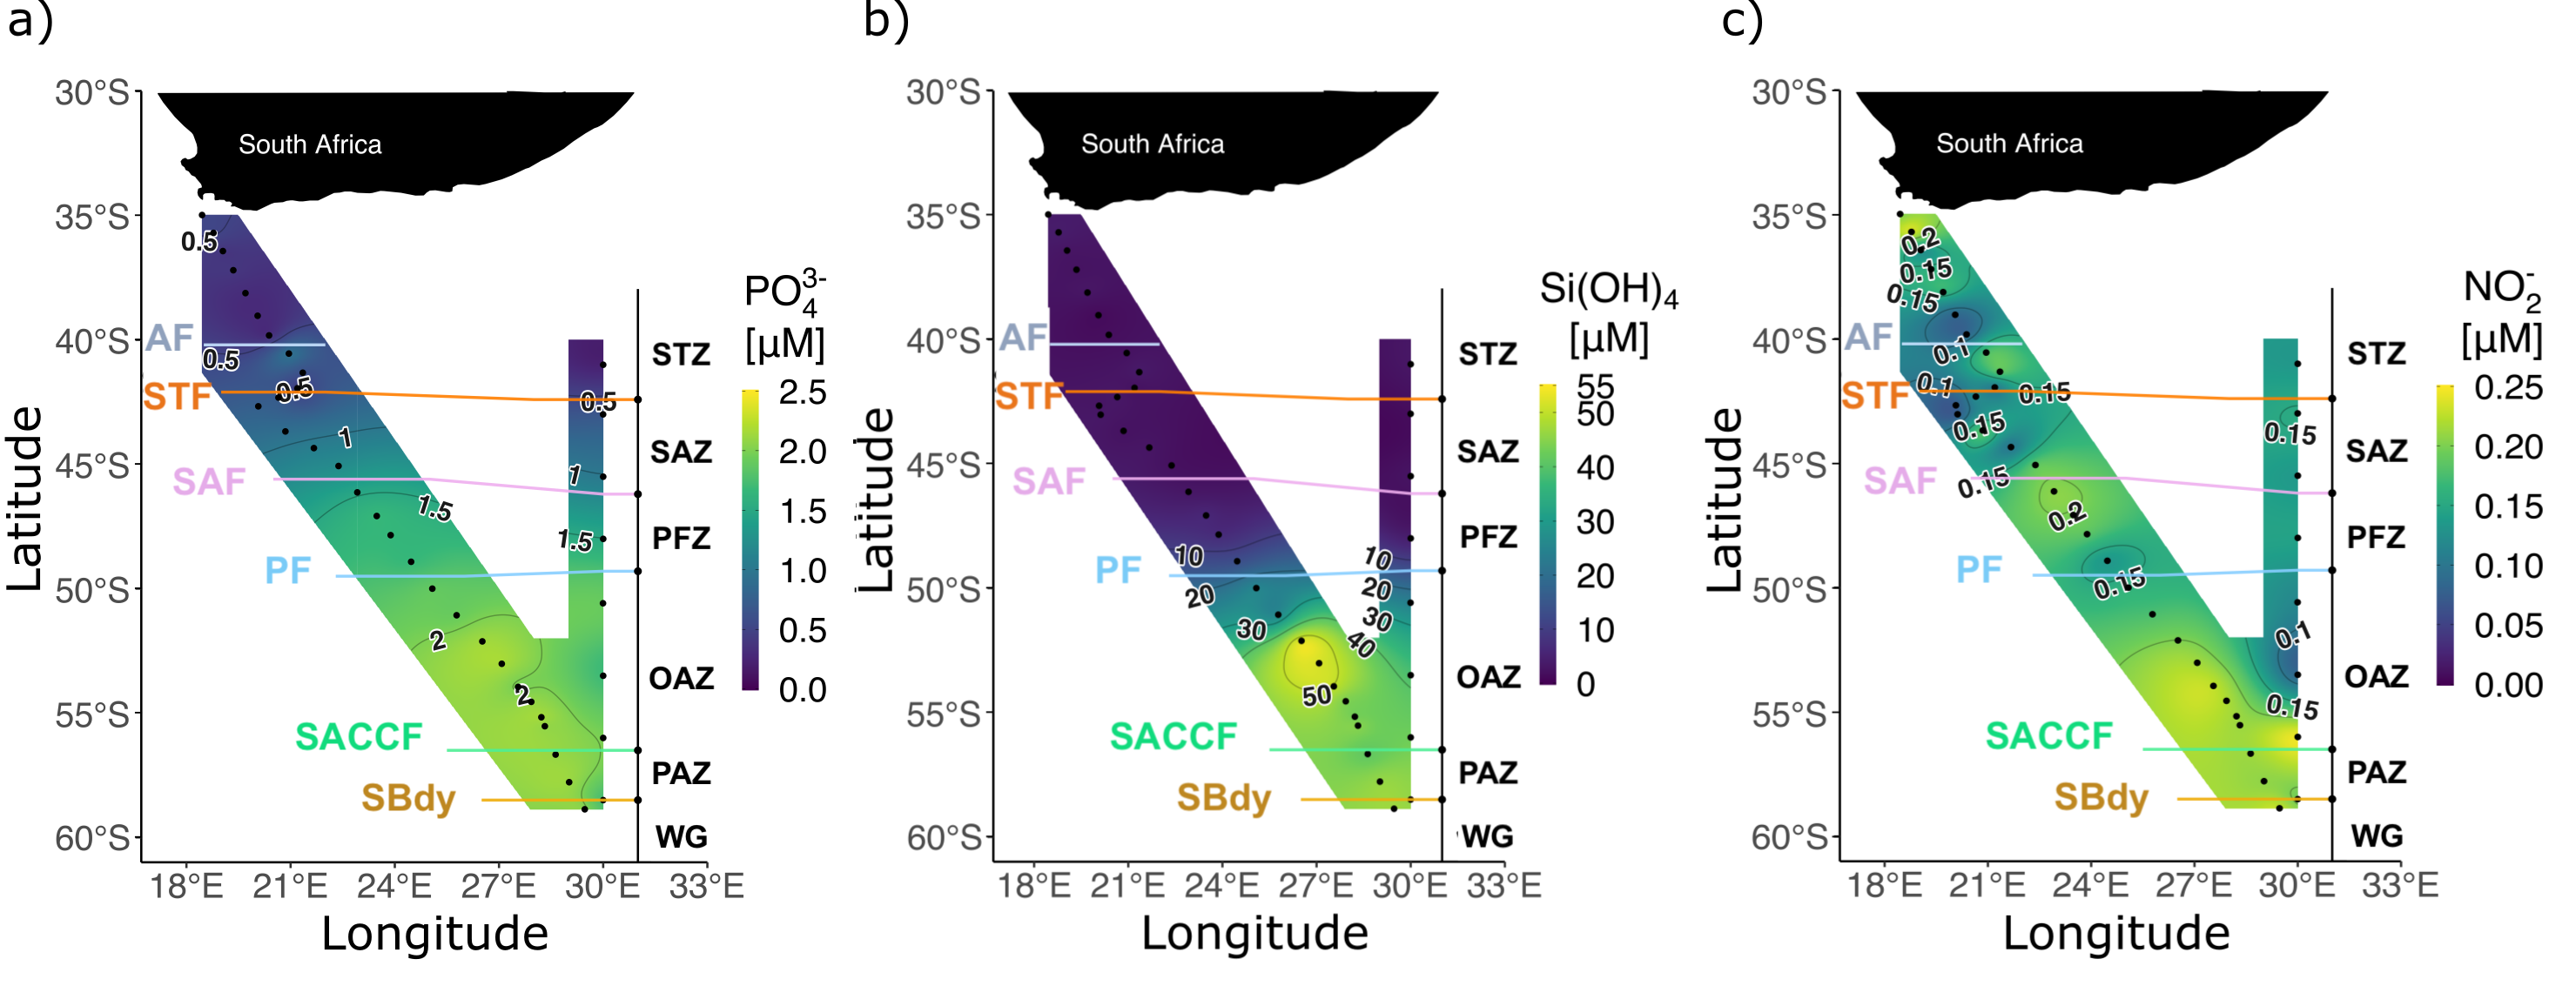

Supplement: Supplementary file 1 [file bg-19-715-2022-supplement.zip › wc17FigureS3v2.png]

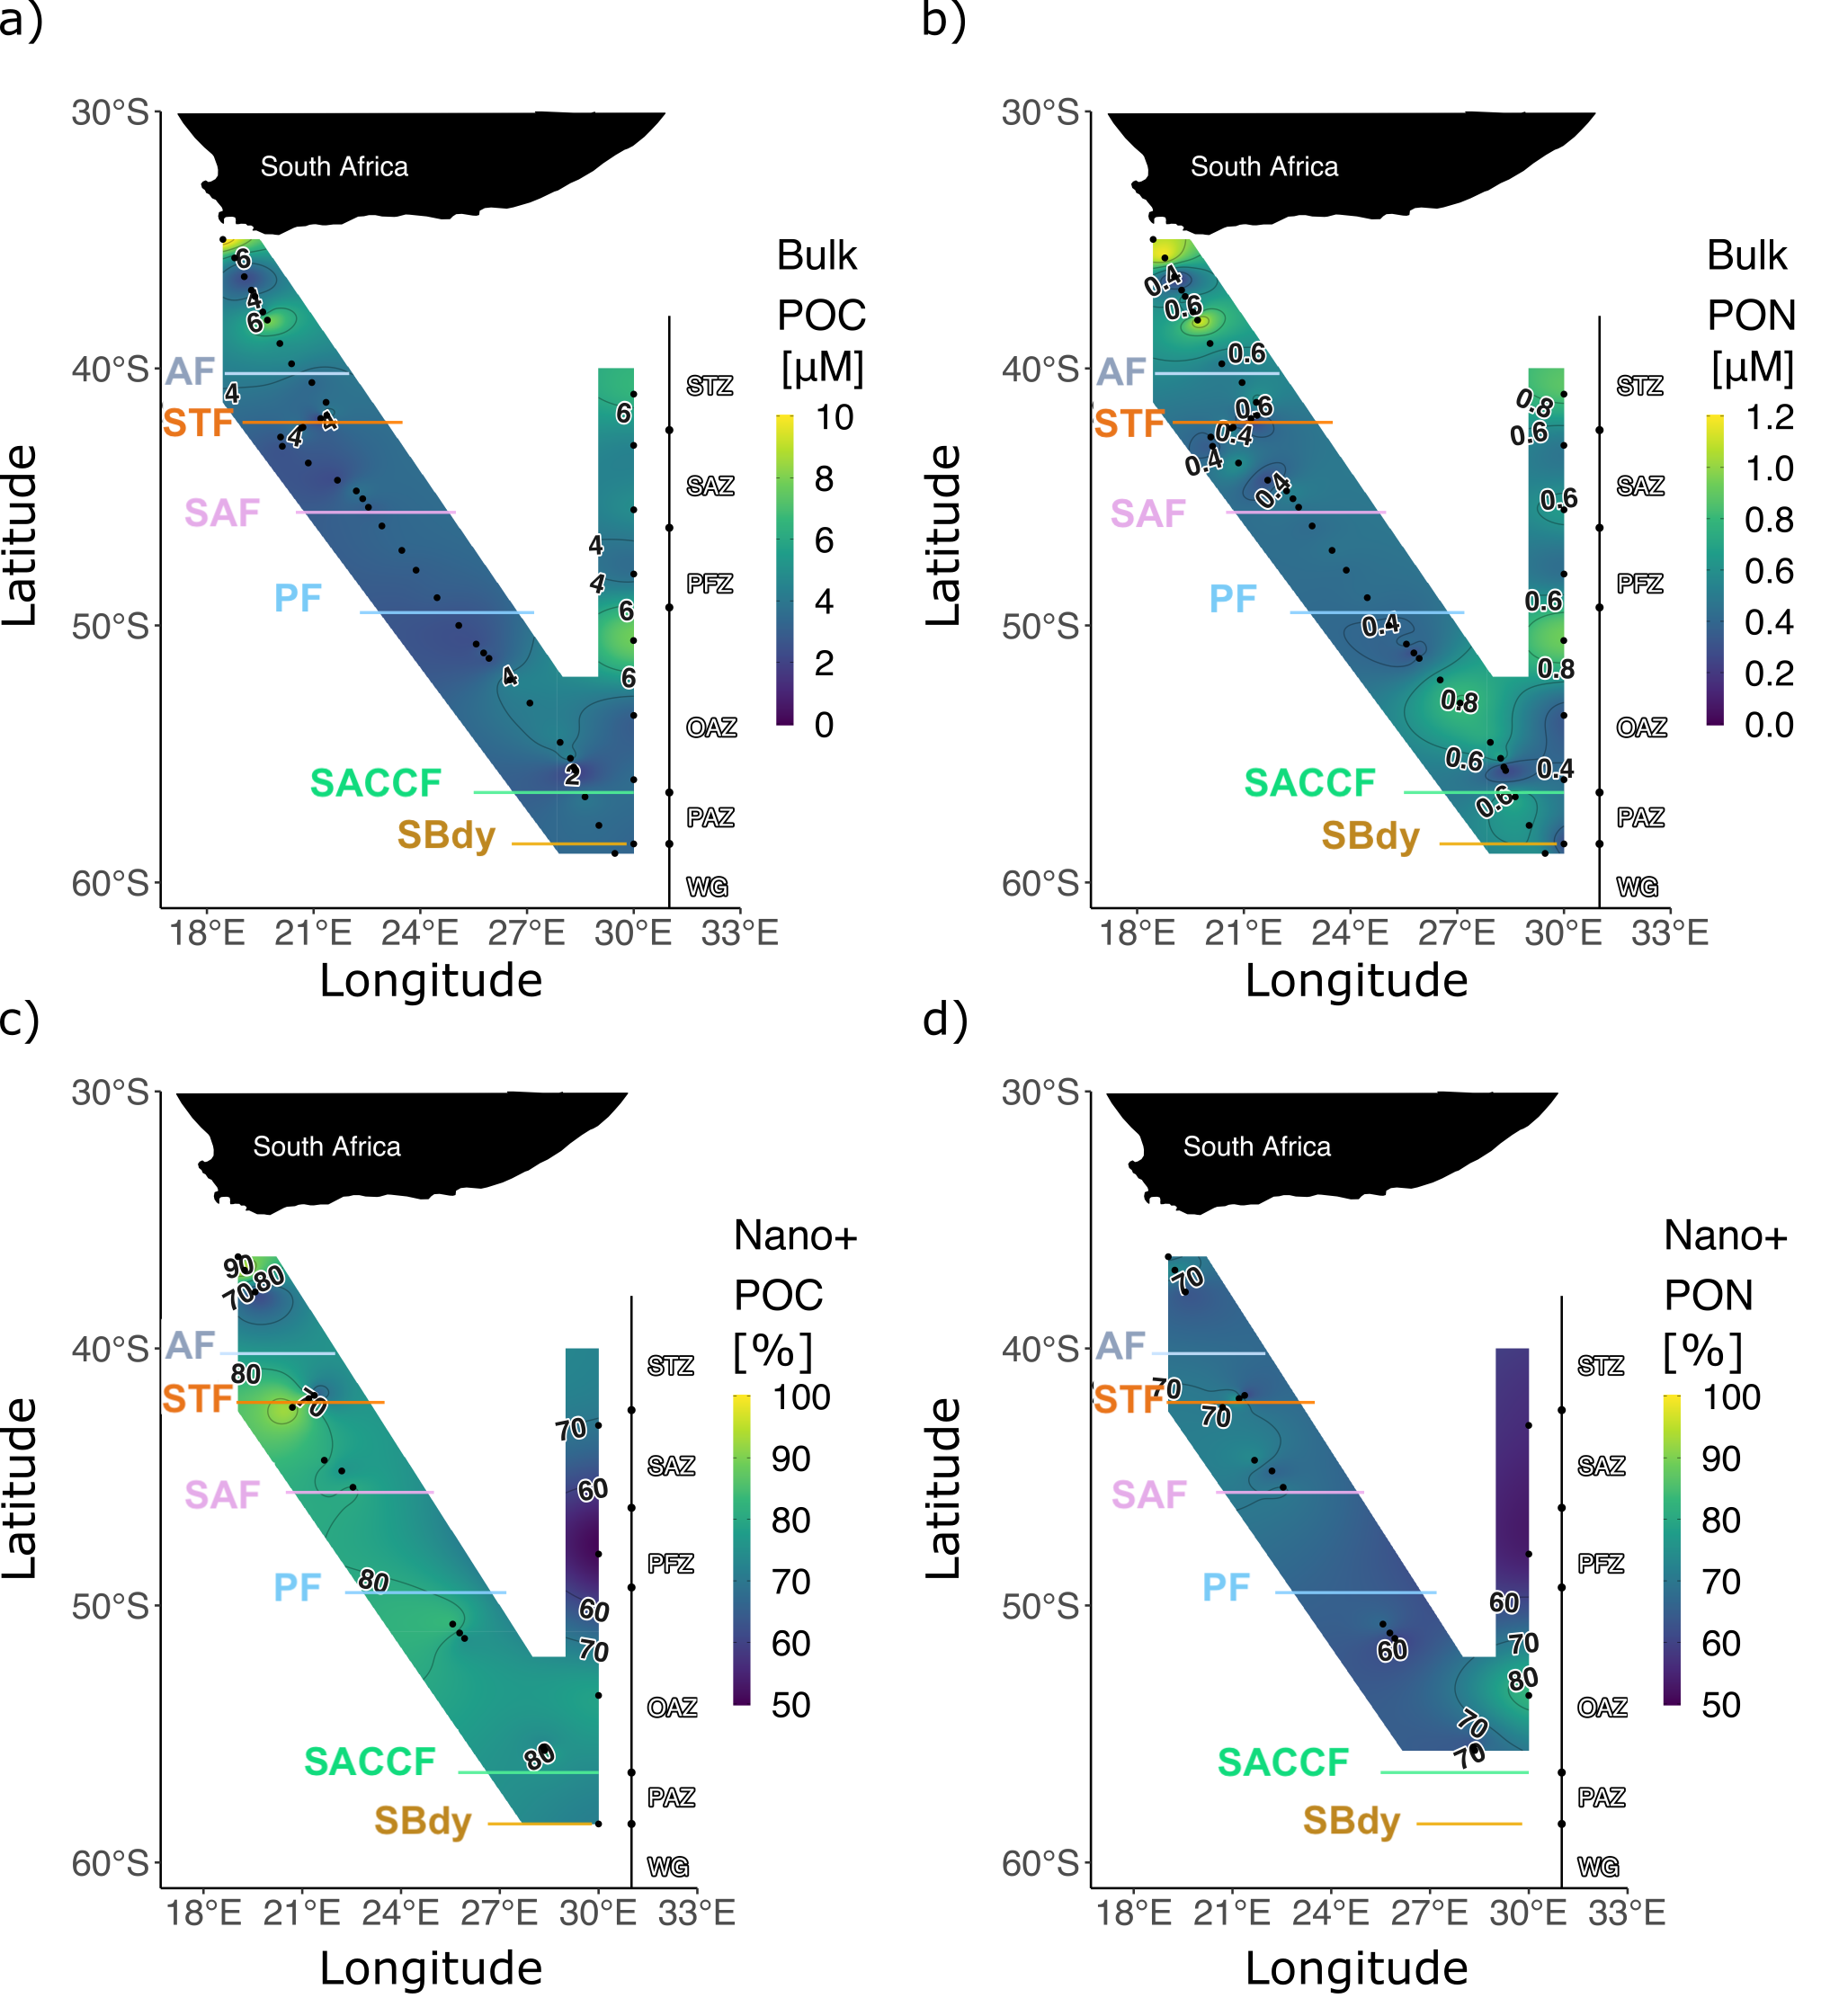

Supplement: Supplementary file 1 [file bg-19-715-2022-supplement.zip › wc17FigureS4.png]

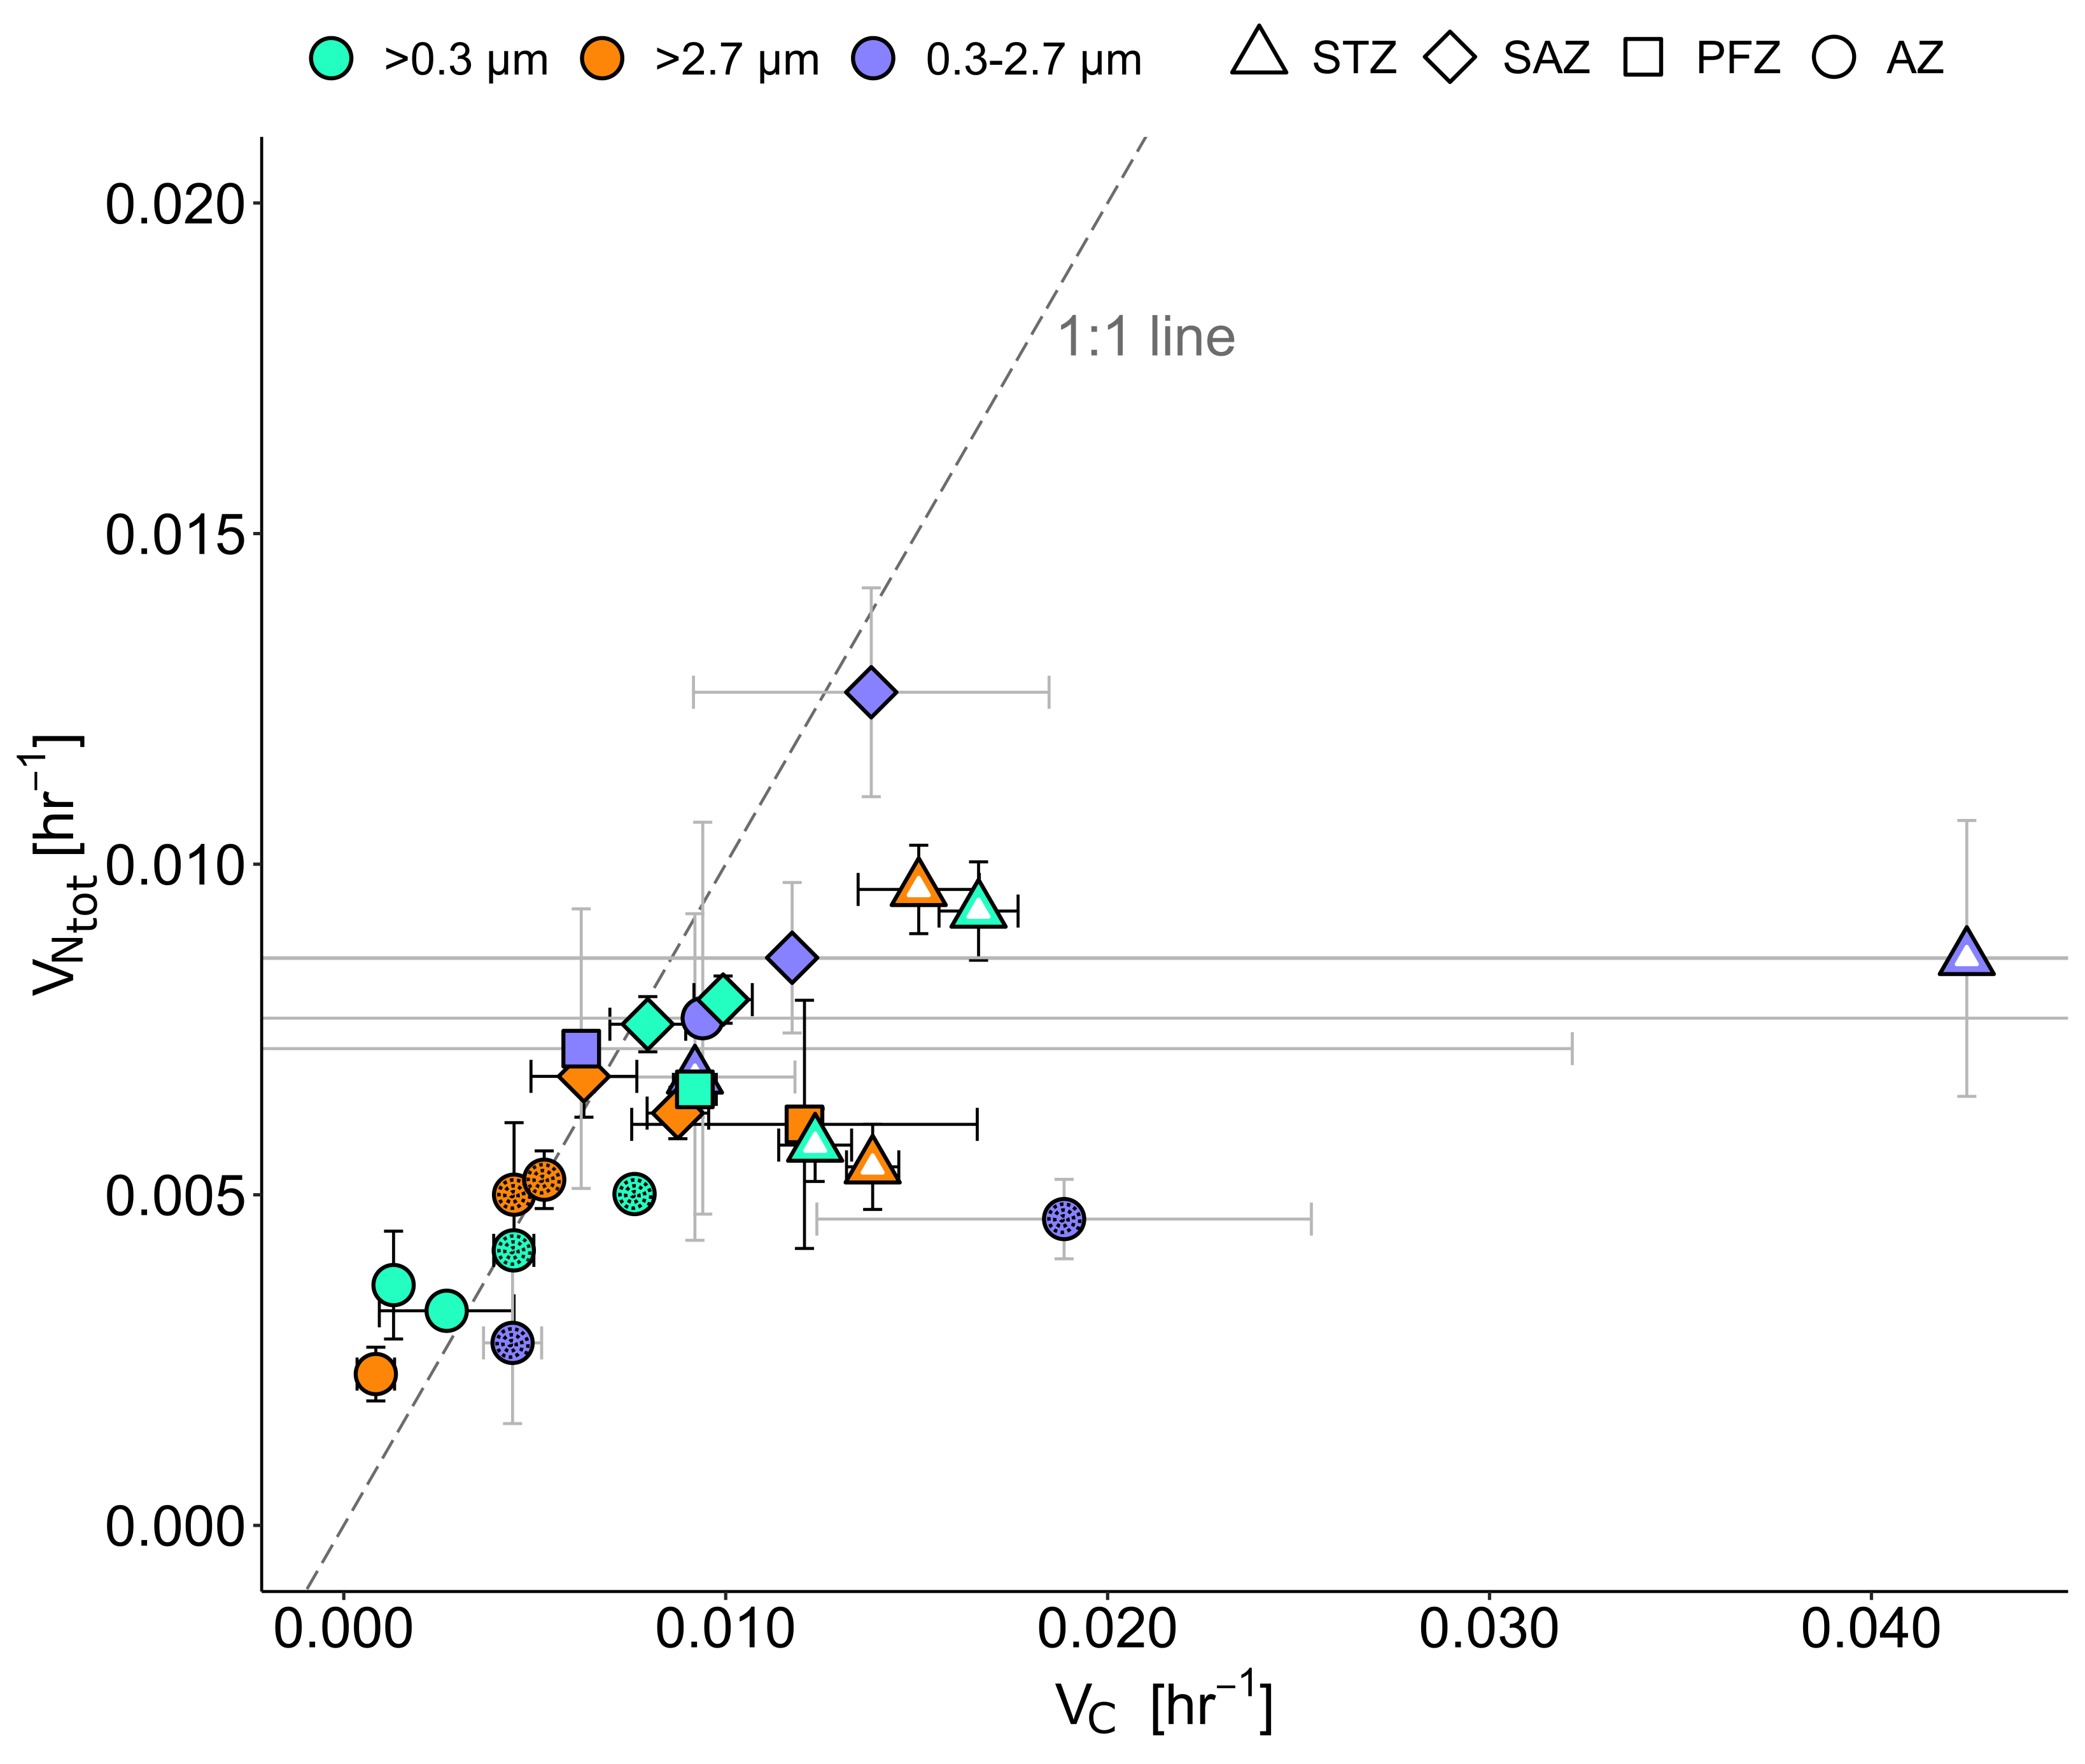

Supplement: Supplementary file 1 [file bg-19-715-2022-supplement.zip › wc17FigureS6_NoUreaMarked.png]
